# Supplementary material
Source: PubMed Central journal article supplement (PMC3172886)

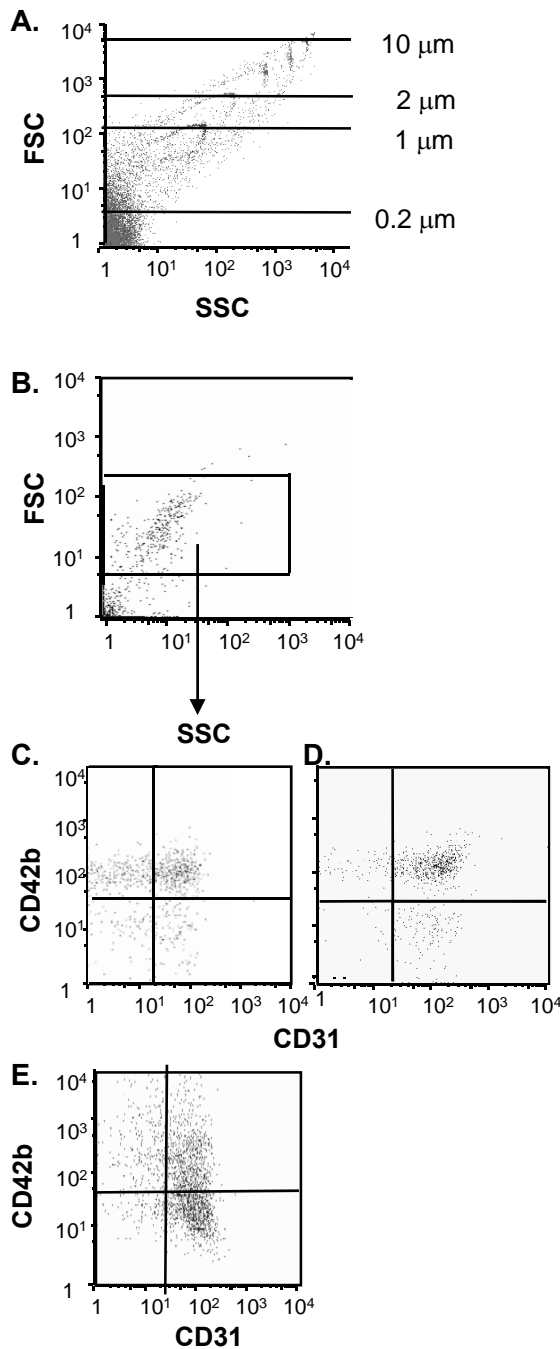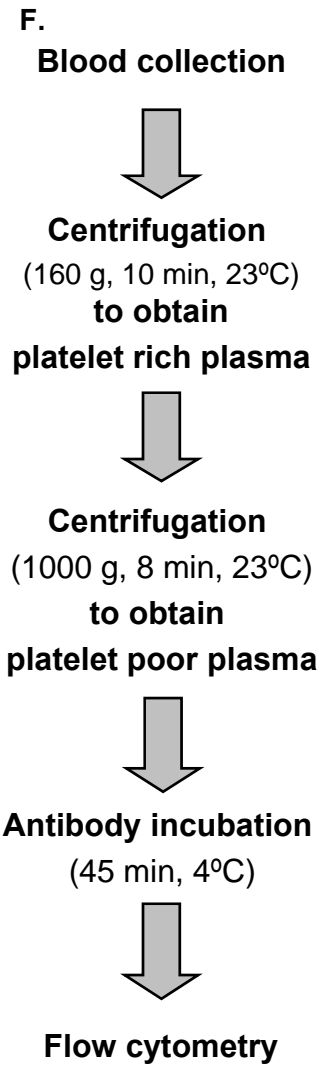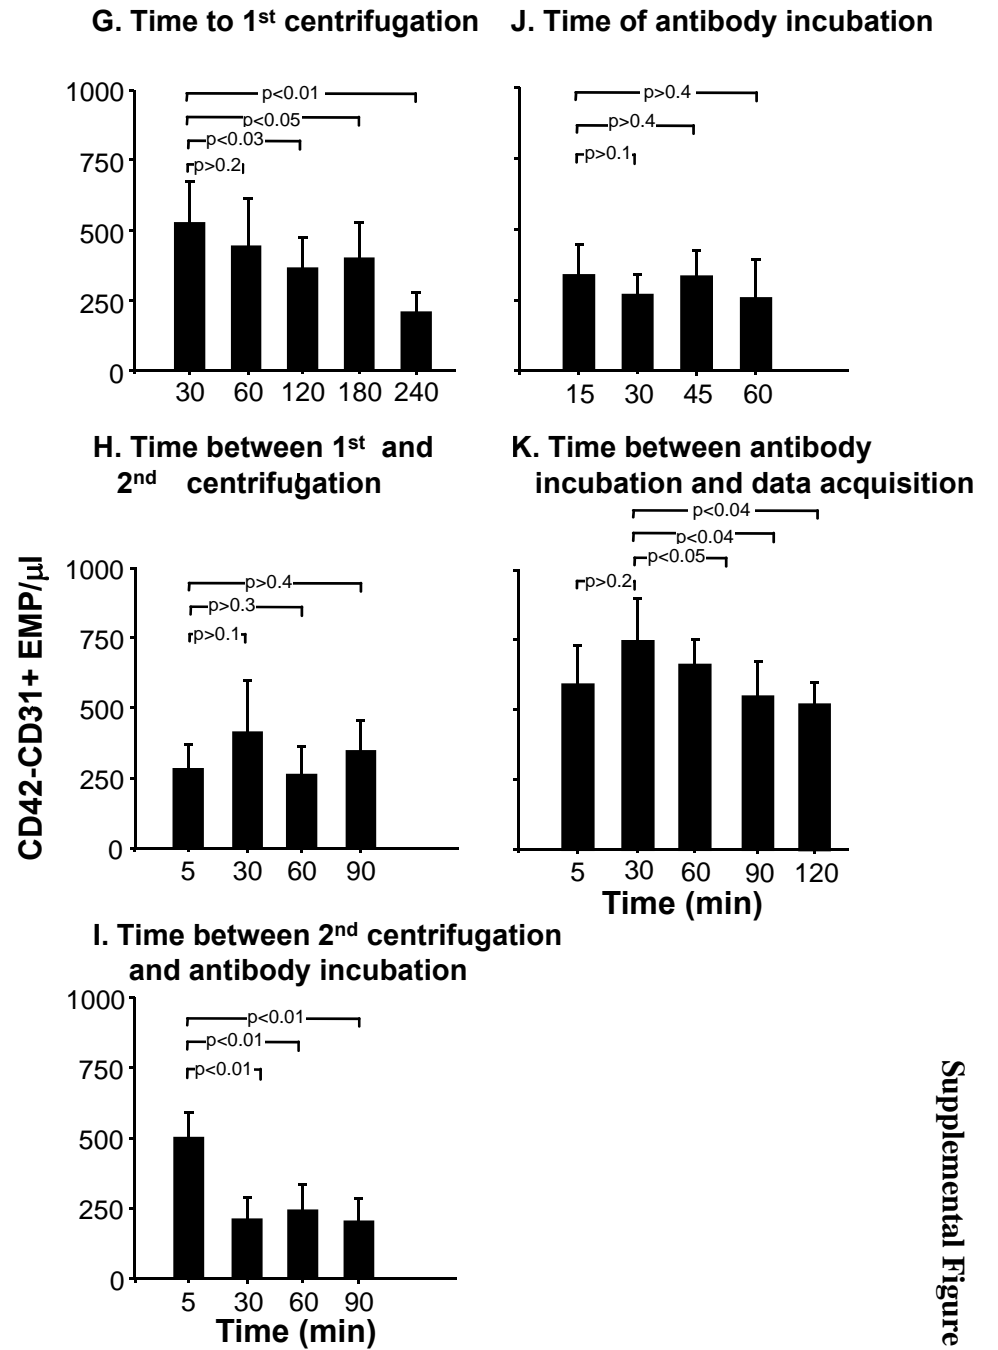

Supplemental Figure 2

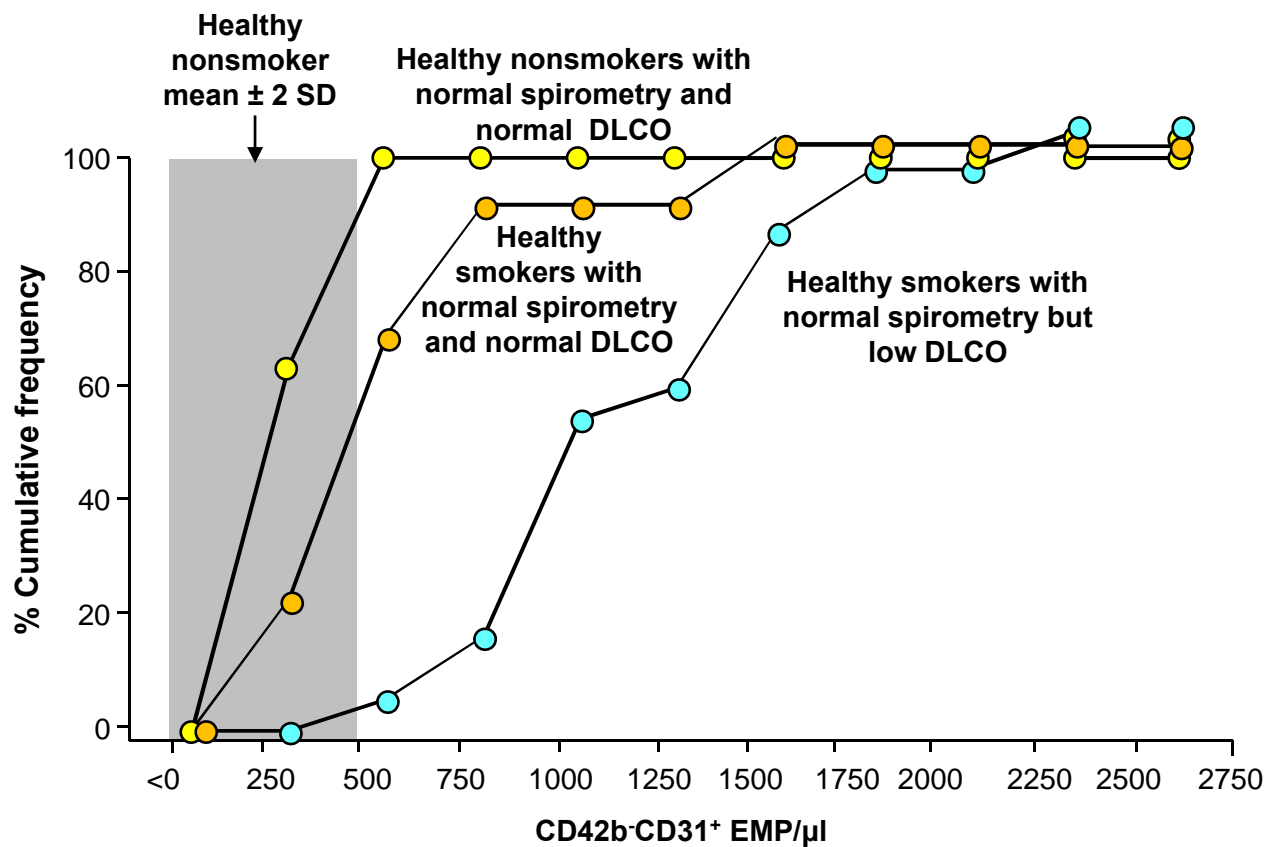

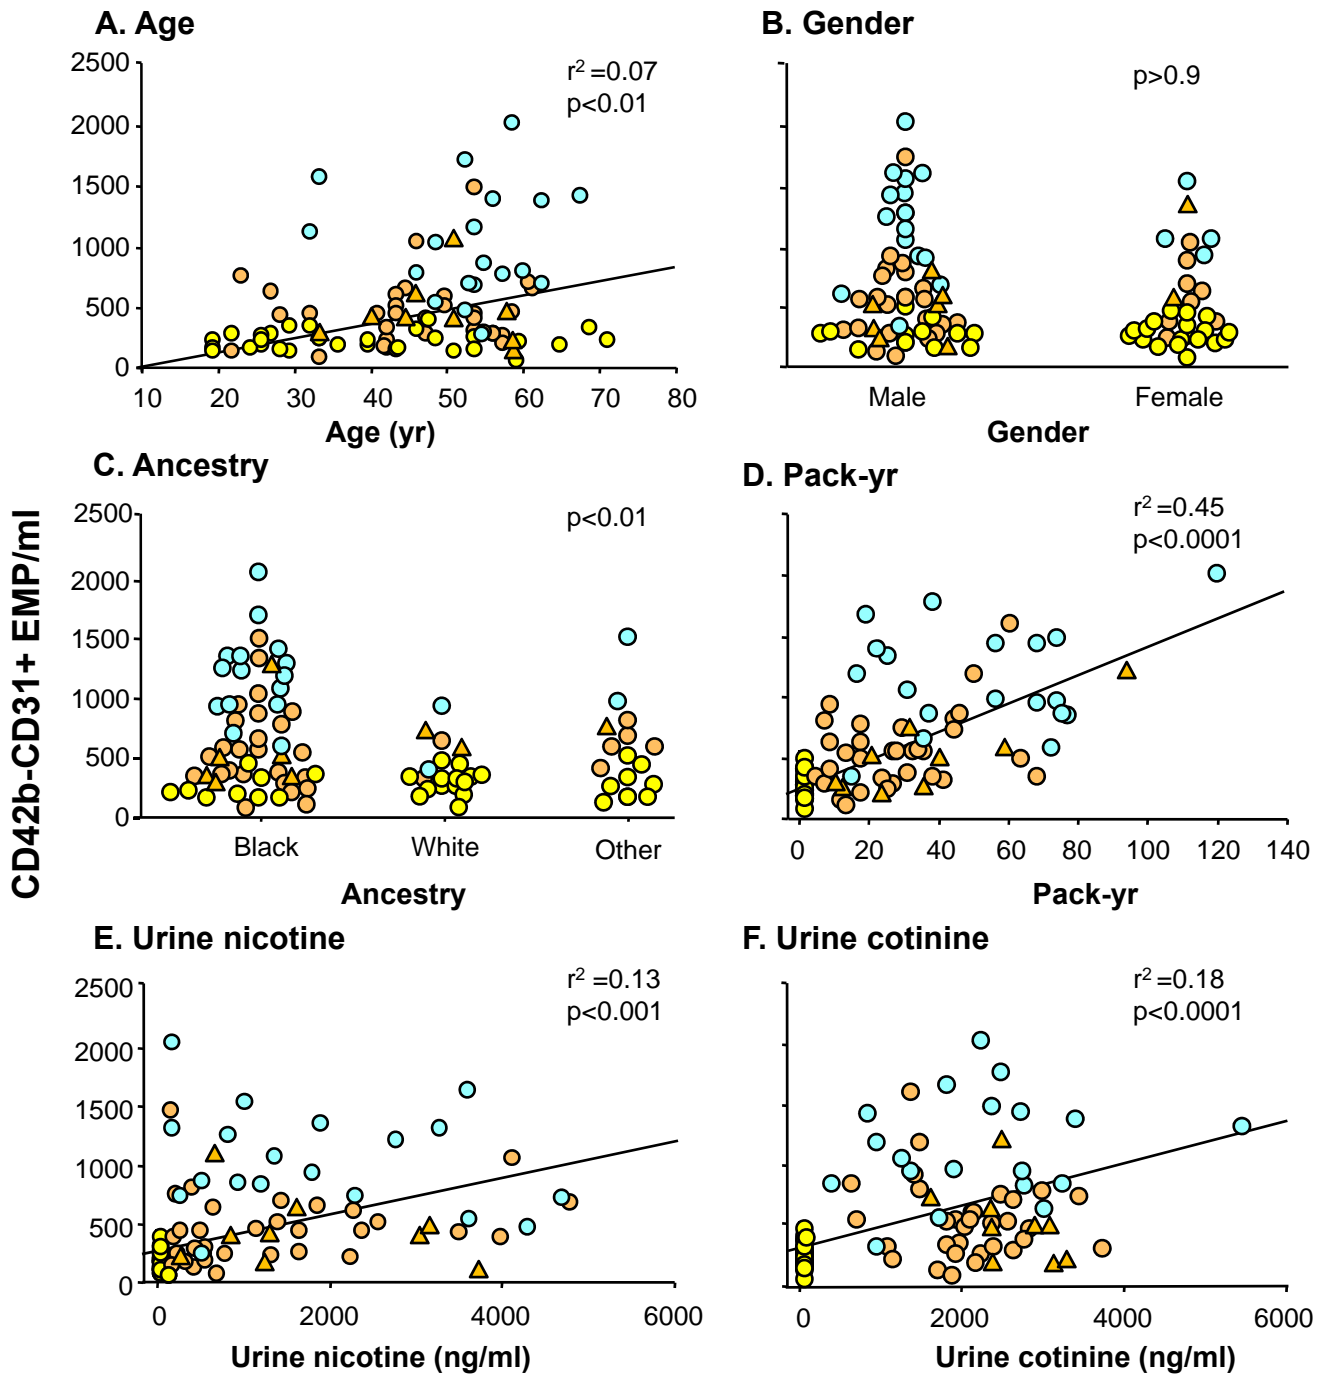

Supplemental Figure 3G-L

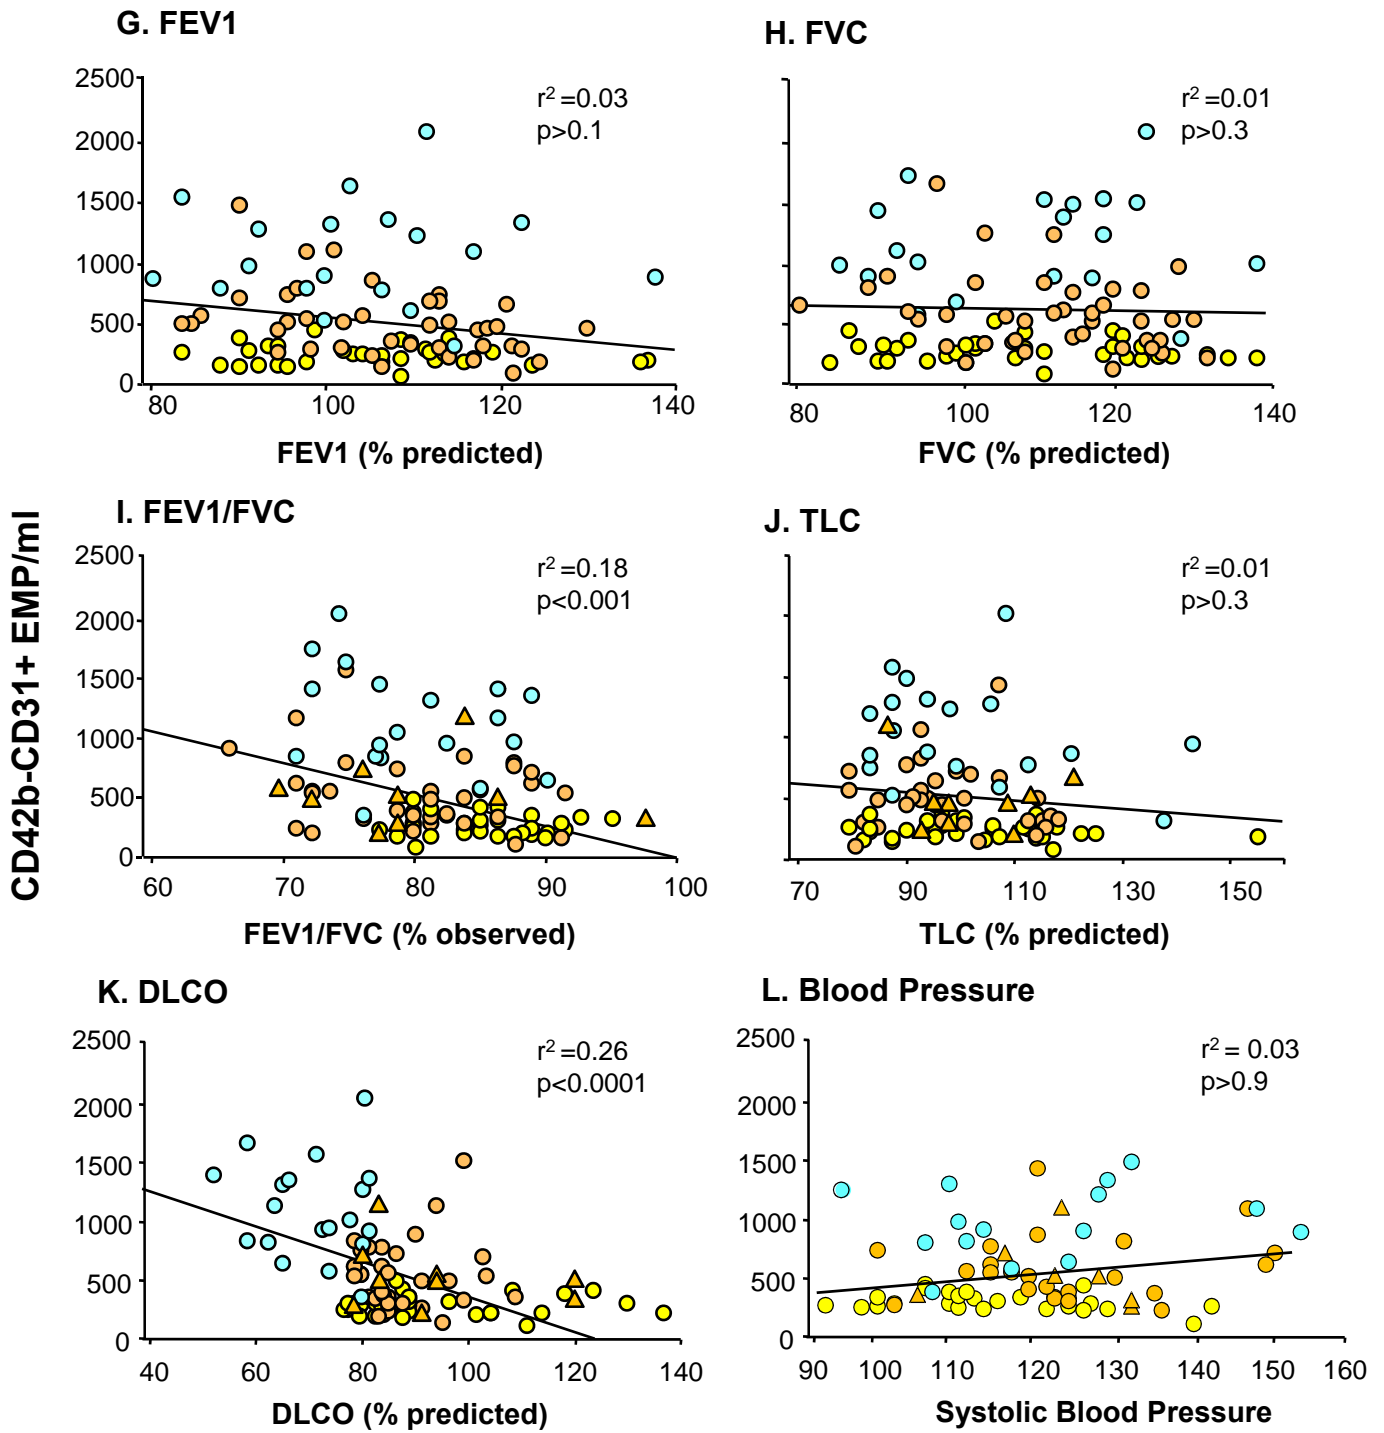

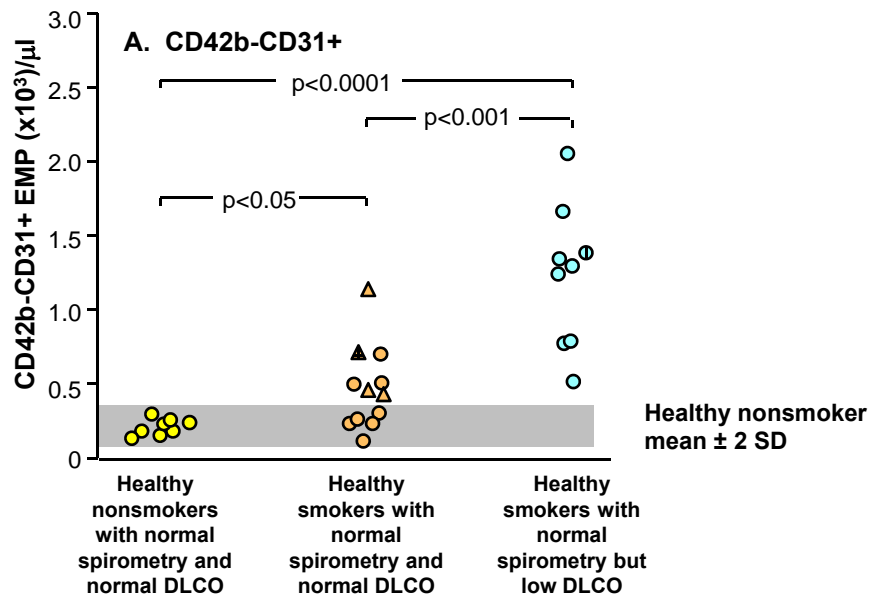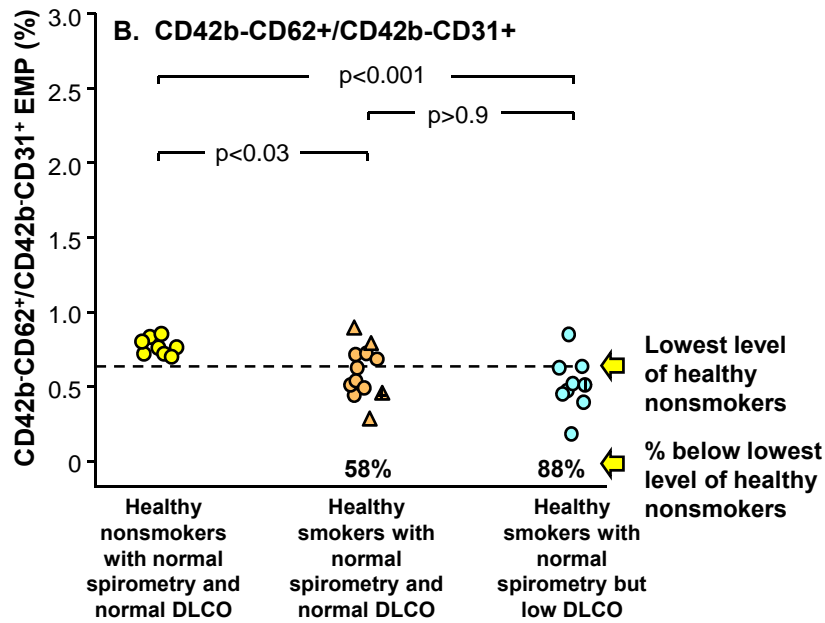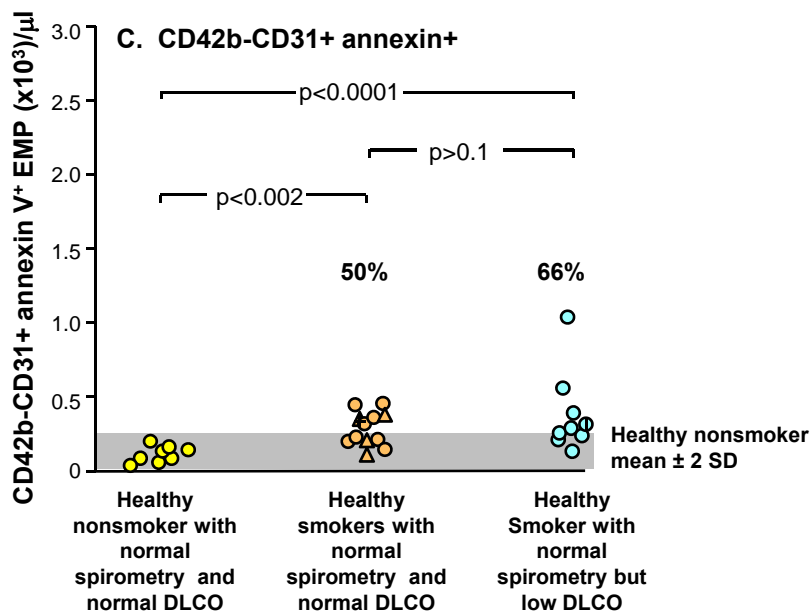

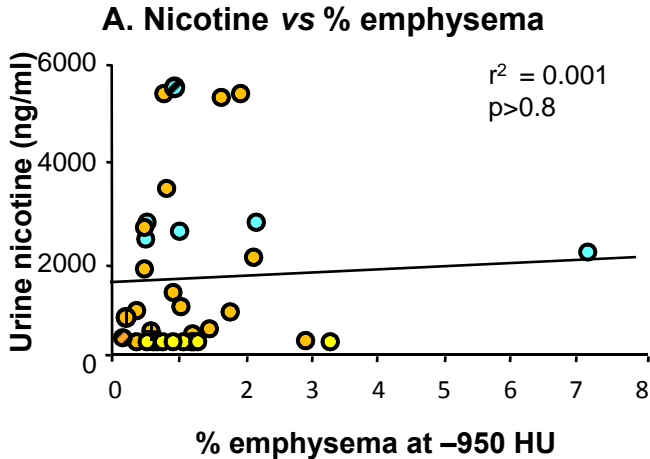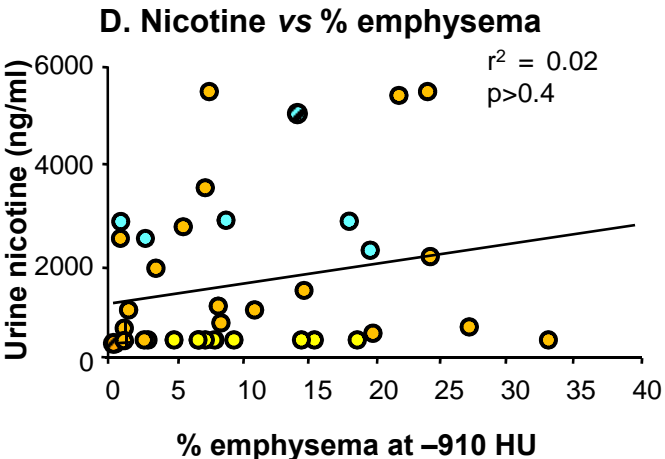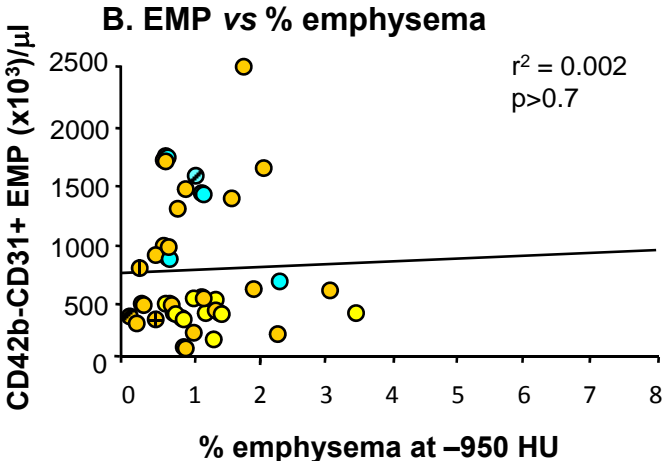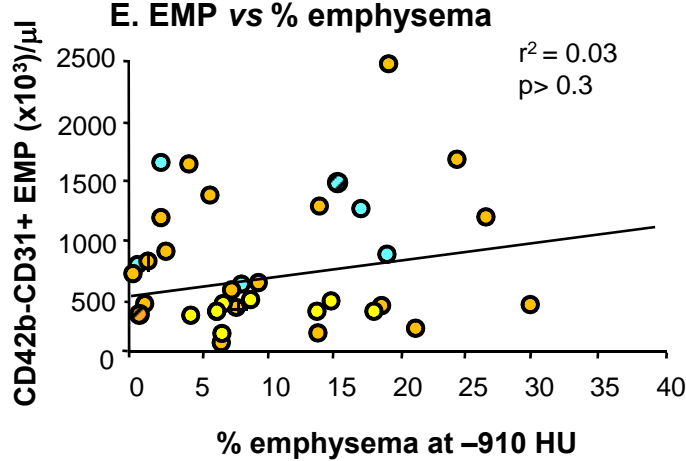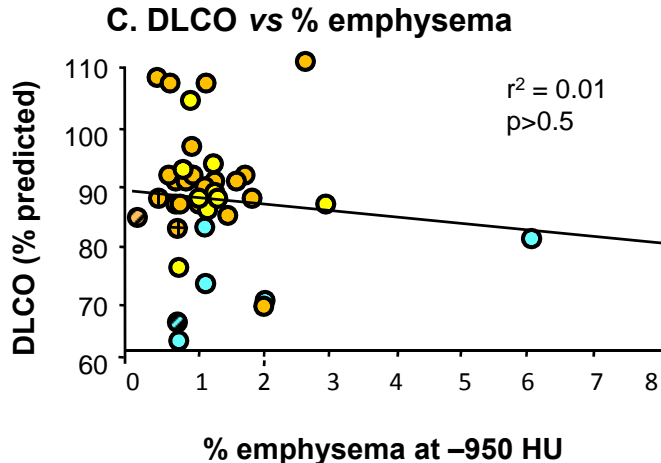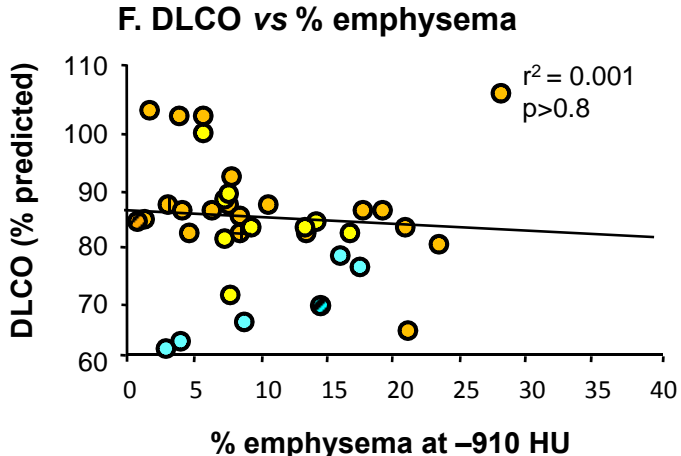

Supplemental Figure 6

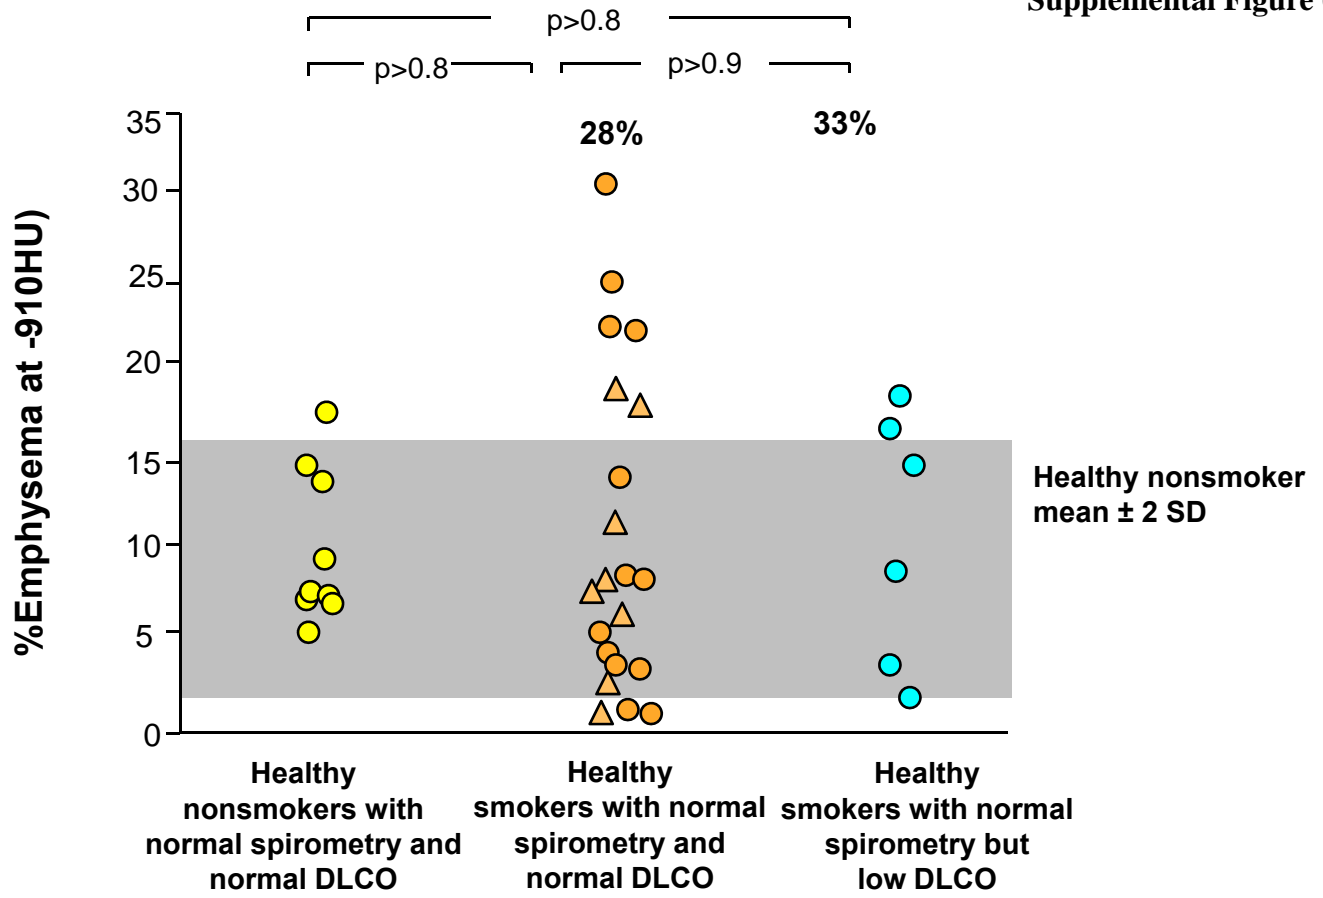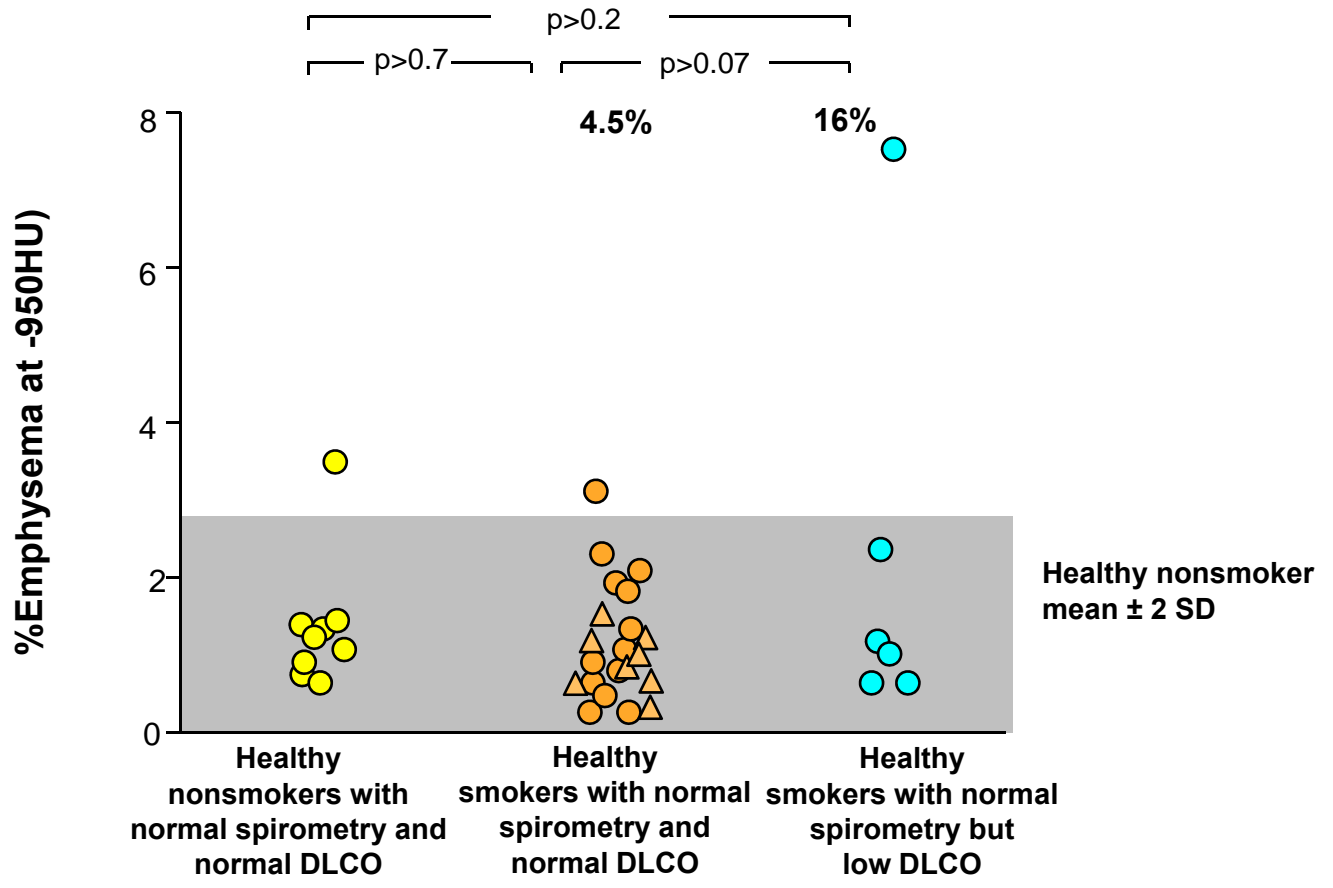

Supplement: supp_184_2_224__2.pdf [file supp_184_2_224__2.pdf]
